# Supplementary figures and images for: DNA polymerase kappa produces interrupted mutations and displays polar pausing within mononucleotide microsatellite sequences
Source: PubMed Central journal article supplement — Nucleic Acids Res. 2007 Dec 13;36(2):688–96. doi: 10.1093/nar/gkm1089 (PMC2241860; doi:10.1093/nar/gkm1089), 2007-12-13

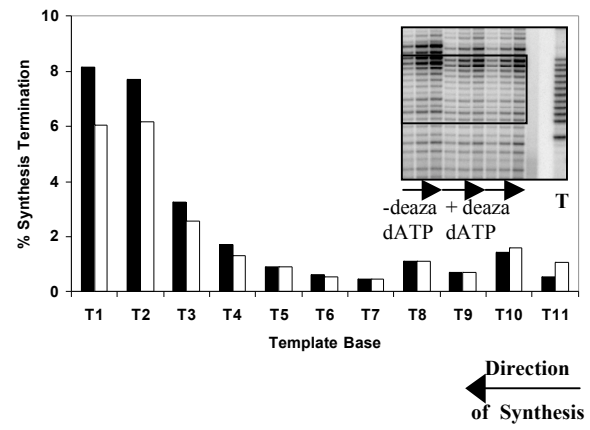

Figure S1  
Hile and Eckert

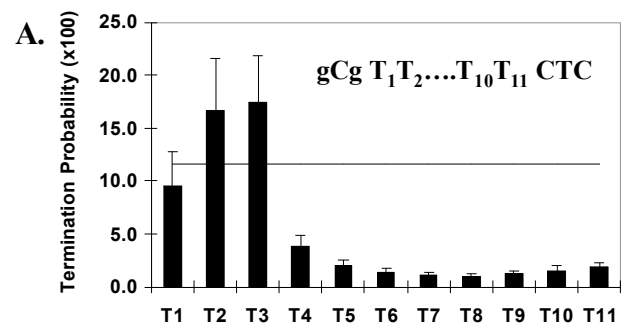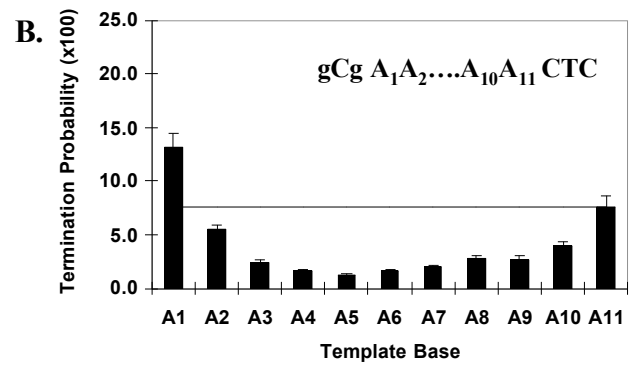

Figure S2  
Hile and Eckert

Supplement: nar_gkm1089_1.pdf [file nar_gkm1089_1.pdf]
